# Supplementary material for: Gamma Radiation (60Co) Induces Mutation during In Vitro Multiplication of Vanilla (Vanilla planifolia Jacks. ex Andrews)
Source: MDPI journal article supplement (doi:10.3390/horticulturae8060503), 2022-06-05

**Gamma Radiation ( $^{60}\text{Co}$ ) Induces Mutation During *In Vitro* Multiplication of Vanilla  
(*Vanilla planifolia* Jacks. ex Andrews)**

María Karen Serrano-Fuentes<sup>1</sup>, Fernando Carlos Gómez-Merino<sup>1</sup>, Serafín Cruz-Izquierdo<sup>2</sup>, José Luis Spinoso-Castillo<sup>1</sup>, Jericó Jabín Bello-Bello<sup>3,\*</sup>

<sup>1</sup> Colegio de Postgraduados Campus Córdoba, Carretera Córdoba Veracruz, Amatlán de los Reyes Km 348, Veracruz 94946, México.

<sup>2</sup> Colegio de Postgraduados Campus Montecillo, Carretera México-Texcoco, Montecillo, Texcoco Km 36.5, Estado de México 56230, México.

<sup>3</sup> CONACYT-Colegio de Postgraduados Campus Córdoba, Carretera Córdoba Veracruz, Amatlán de los Reyes Km 348, Veracruz 94946, México. \*Correspondence and requests for materials should be addressed to J.J.B.-B. (email: [jericobello@gmail.com](mailto:jericobello@gmail.com))

**Figure S4.** Effect of gamma radiation on *in vitro* surviving fraction of vanilla (*Vanilla planifolia* Jacks. ex Andrews)

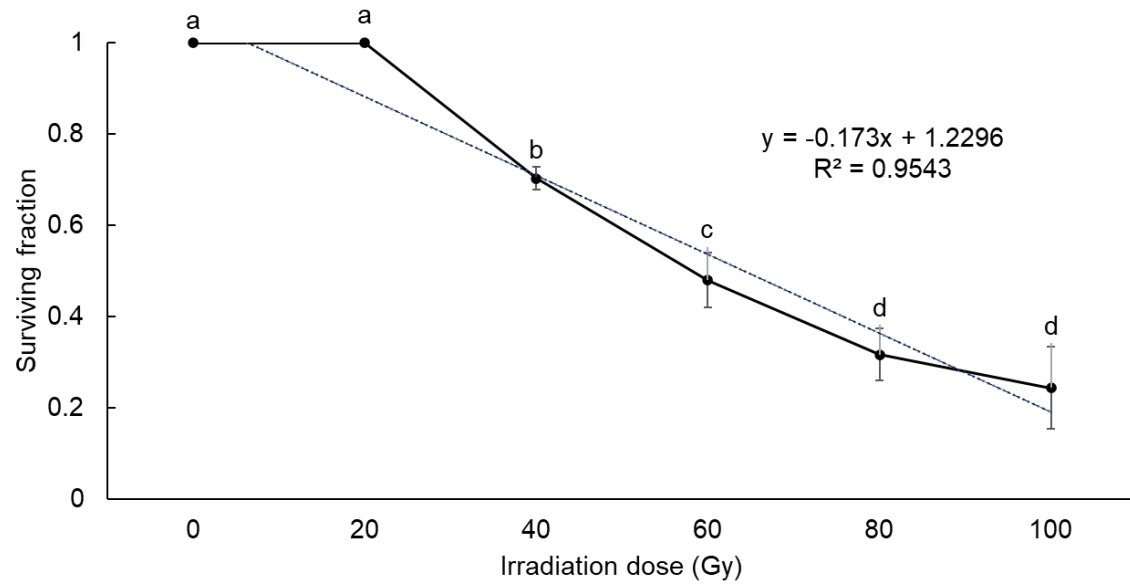

Supplement: s1 [file s1]
